# Supplementary material for: A Comparative Study of the Arabidopsis thaliana Guard-Cell Transcriptome and Its Modulation by Sucrose
Source: PubMed Central journal article supplement (PMC3504121; doi:10.1371/journal.pone.0049641), 2012-11-21

Figure S2. Scatter plots comparing normalized signal intensities for each data point on biological replicate microarrays. The lines show the range for two-fold signal intensity differences. A, C, E Arrays for RNAs from guard cells of wild type (Col-0) plants. B, D, E Guard cell RNAs from rgs1 plants. A, B leaves treated with mannitol. C, D leaves treated sucrose. E, F leaves floated on buffer without added sugar (NS).

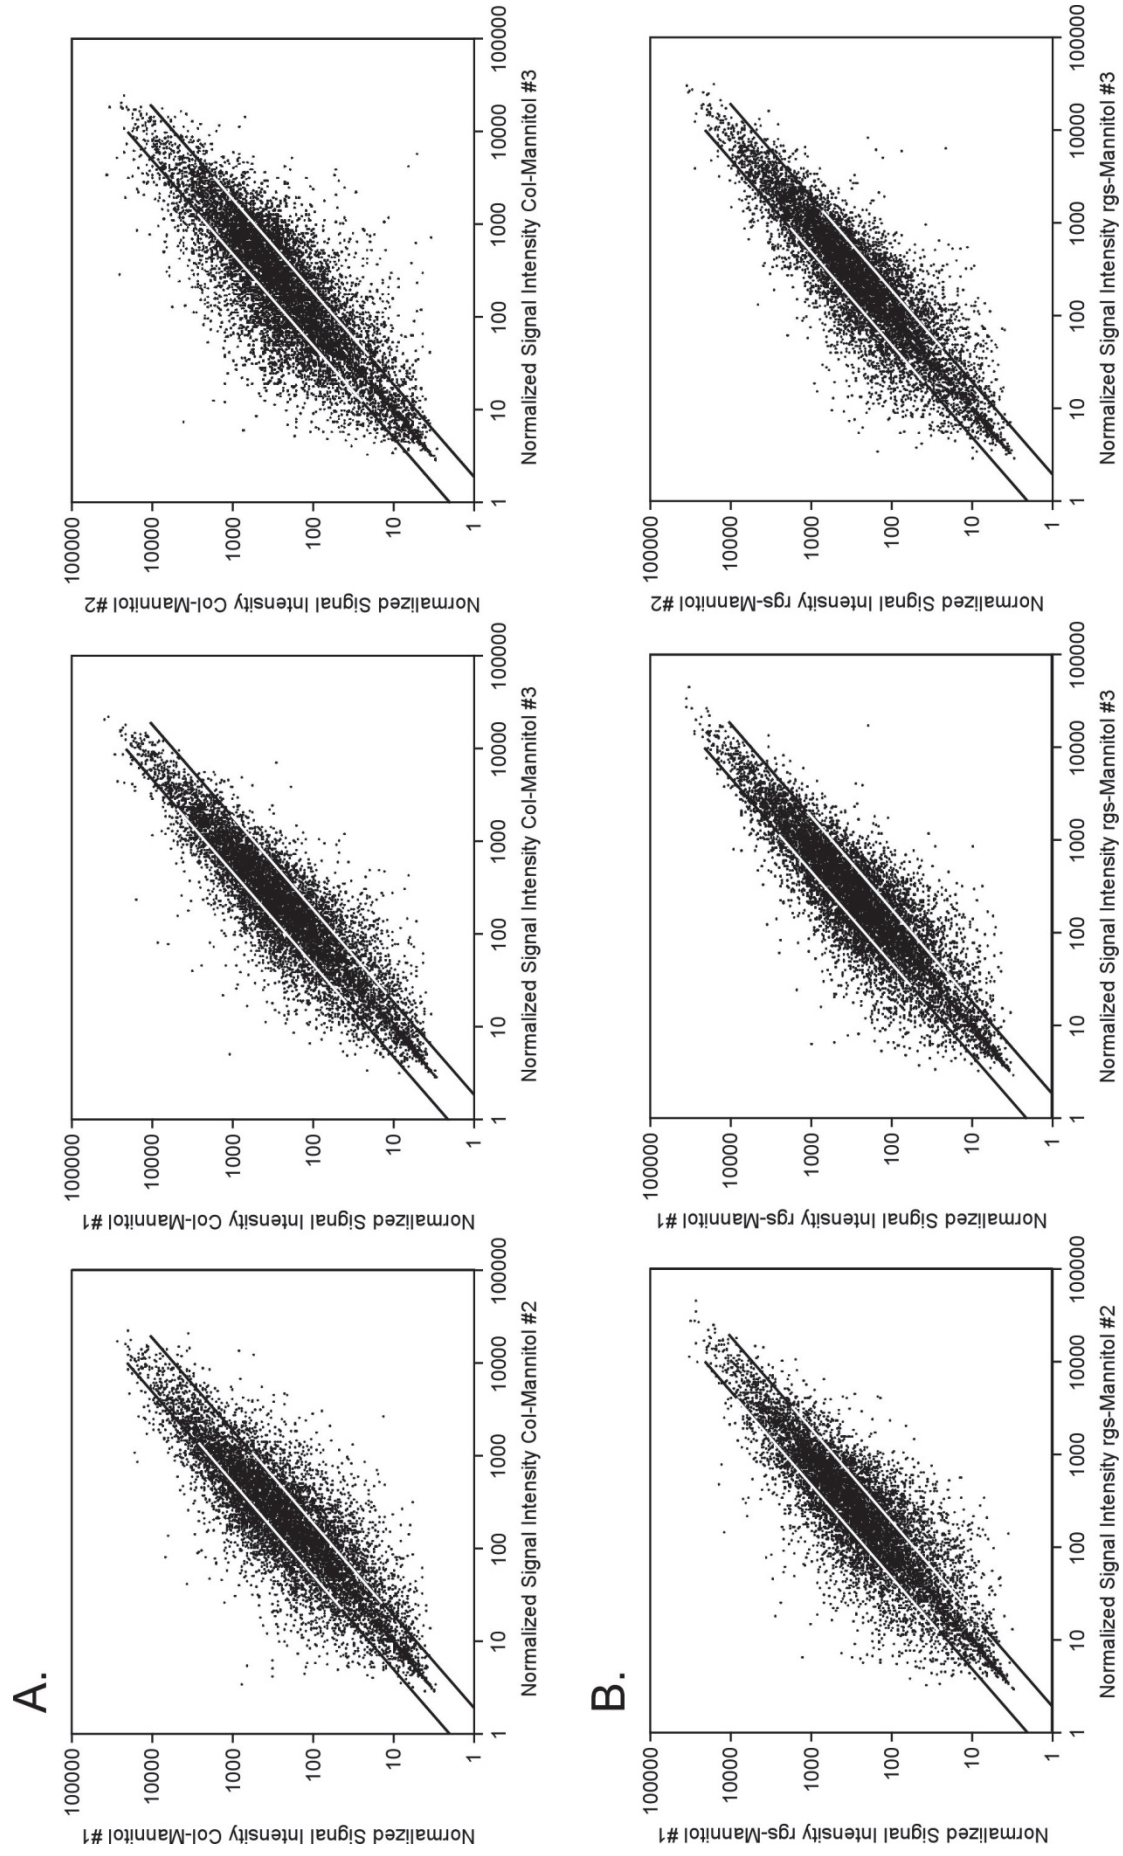

C.

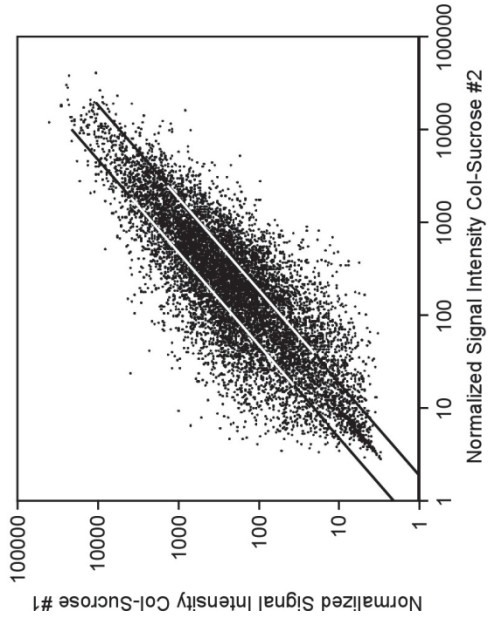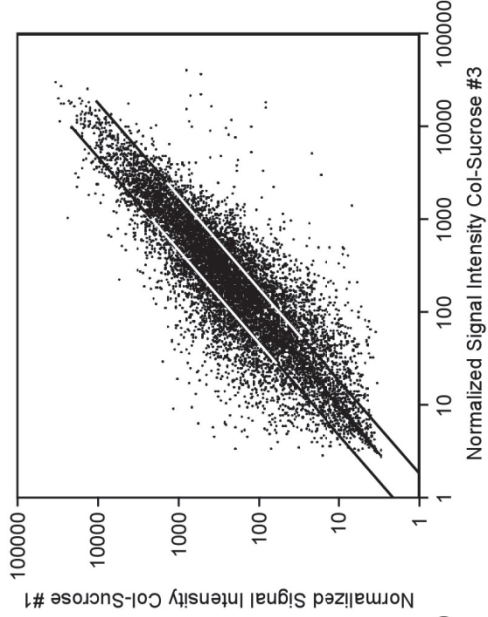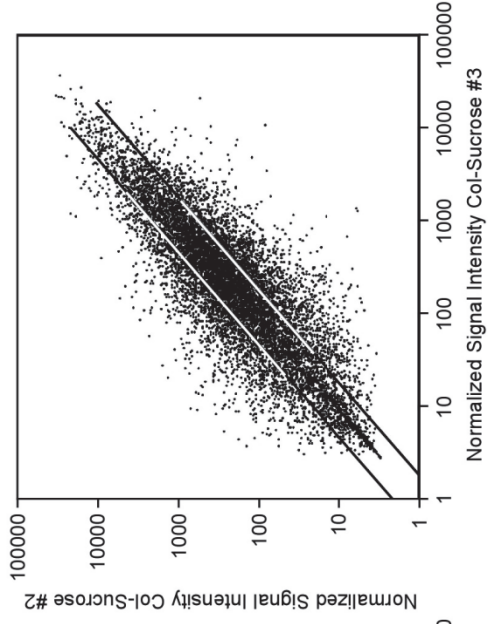

D.

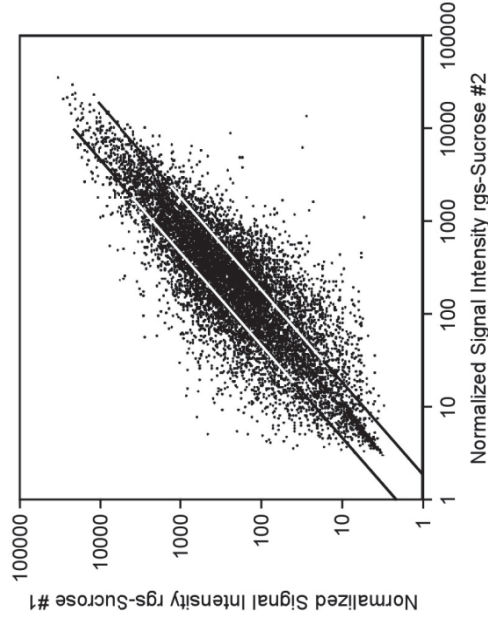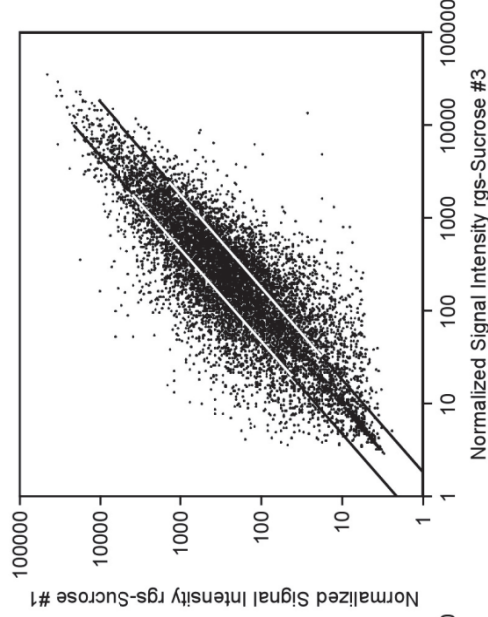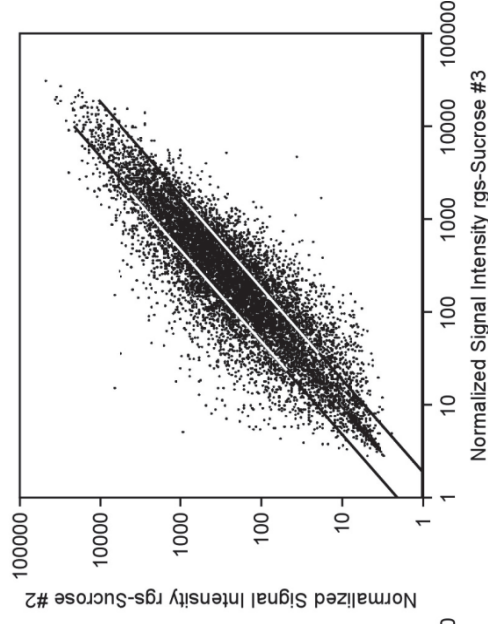

**E.**

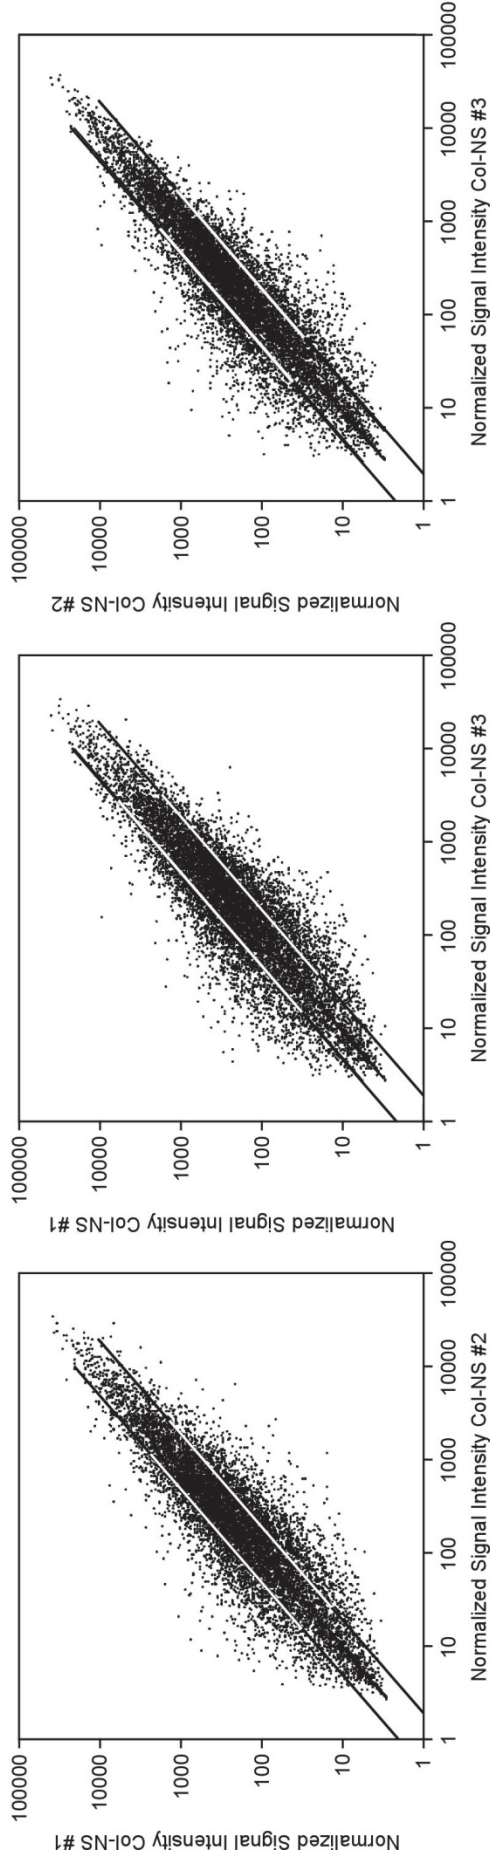

**F.**

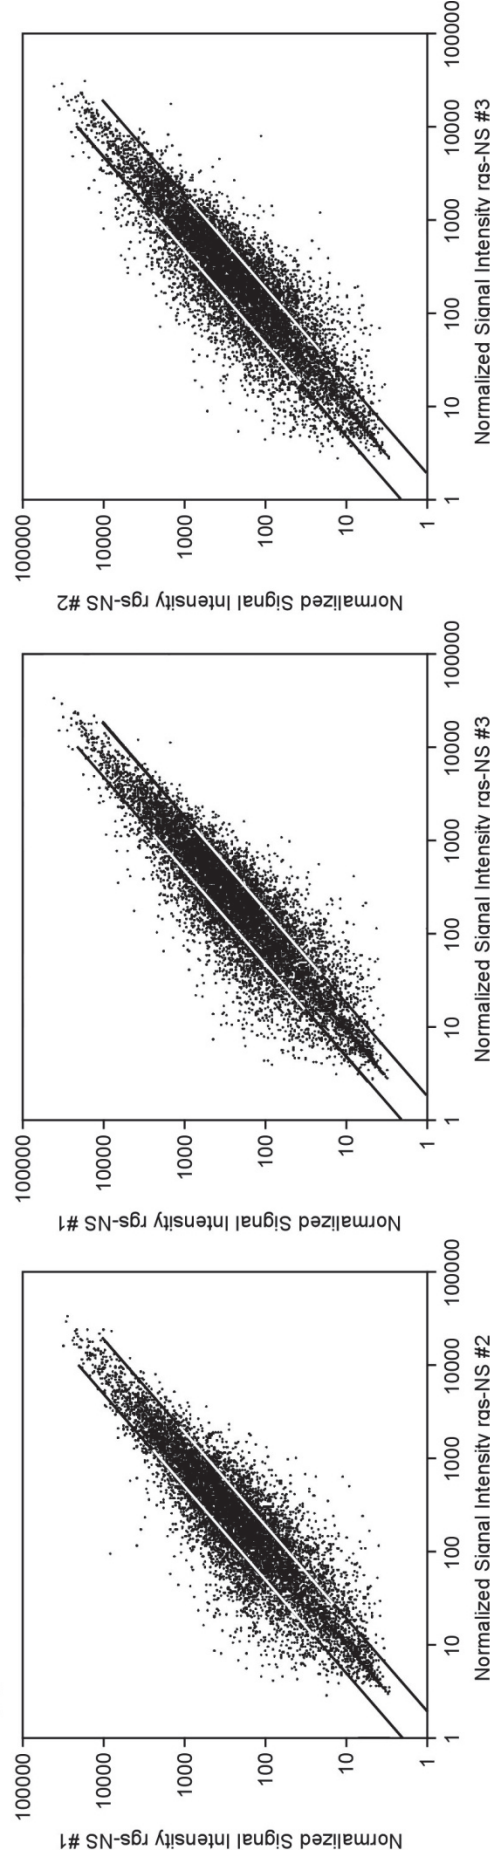

Supplement: pone.0049641.s002.pdf [file pone.0049641.s002.pdf]
